# Supplementary material
Source: PubMed Central journal article supplement (PMC11071778)

**A**

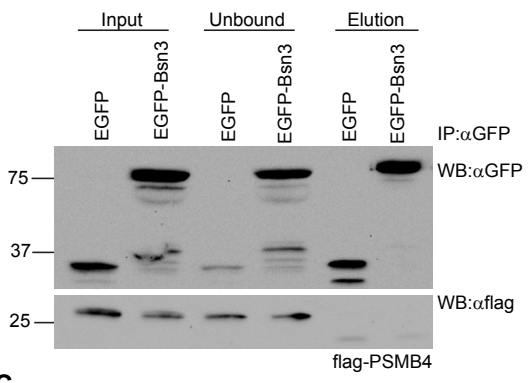

**B**

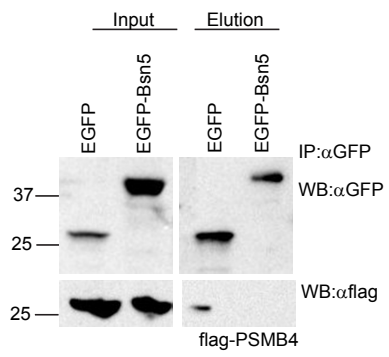

**C**

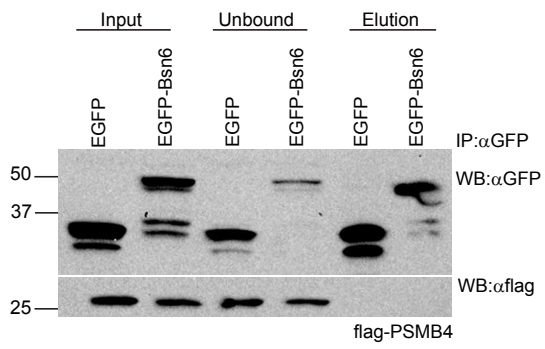

**D**

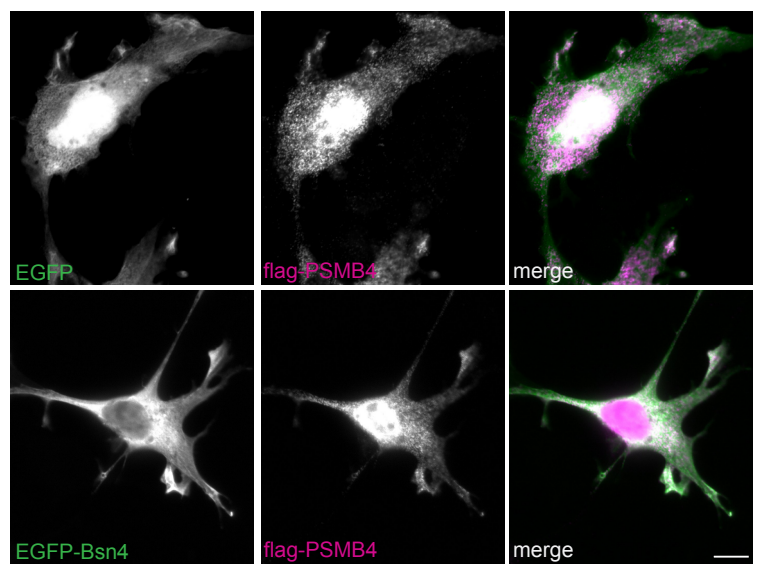

Supplement: 18_2020_3590_MOESM1_ESM.pdf [file 18_2020_3590_MOESM1_ESM.pdf]
